# Supplementary material for: Classification of four distinct osteoarthritis subtypes with a knee joint tissue transcriptome atlas
Source: Springer Nature journal article supplement (doi:10.1038/s41413-020-00109-x), 2020-11-12
Supplement: 41413_2020_109_MOESM4_ESM.pdf [file 41413_2020_109_MOESM4_ESM.pdf]

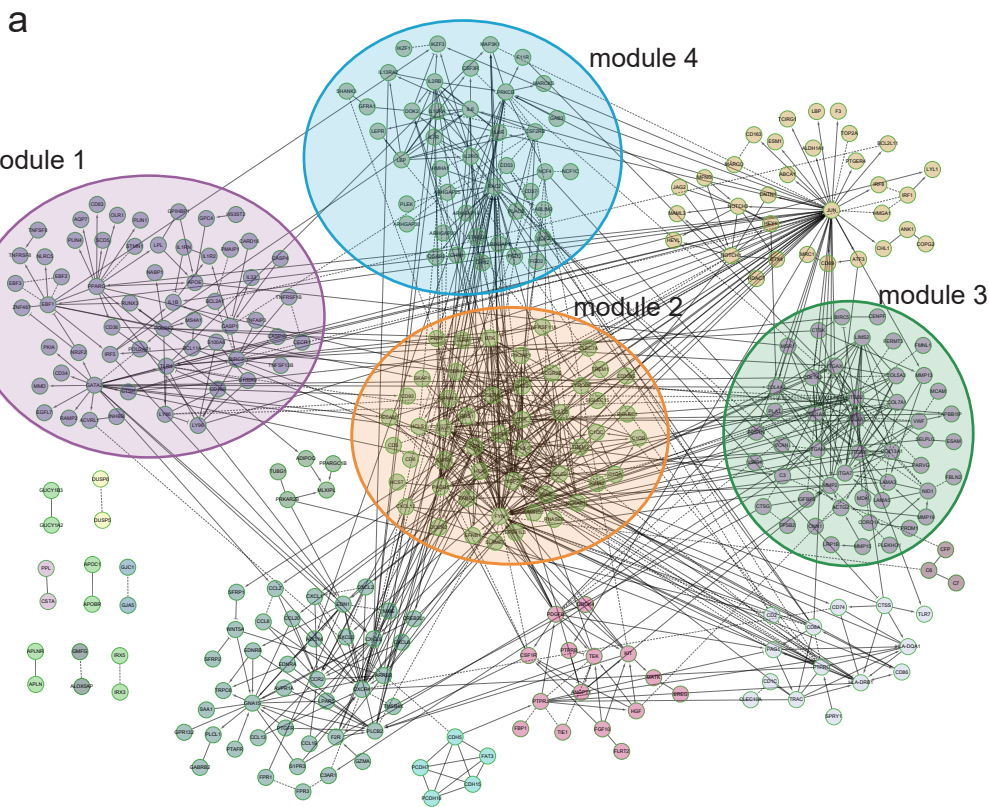

module1:  
 inflammatory response(1.13E-07)  
 apoptotic process(2.56E-06)  
 response to lipid(6.13E-06)  
 immune response(4.35E-05)

module2:  
 innate immune response (1.11E-16)  
 Fc-gamma receptor signaling pathway  
 involved in phagocytosis(1.41E-10)  
 adaptive immune response(6.31E-08)

module3:  
 extracellular matrix organization  
 (1.11E-16)  
 collagen catabolic process(1.11E-16)  
 cell-matrix adhesion(3.59E-08)

module4:  
 positive regulation of GTPase  
 activity(4.20E-12)  
 bone growth(4.42E-05)  
 T cell differentiation(1.74E-04)

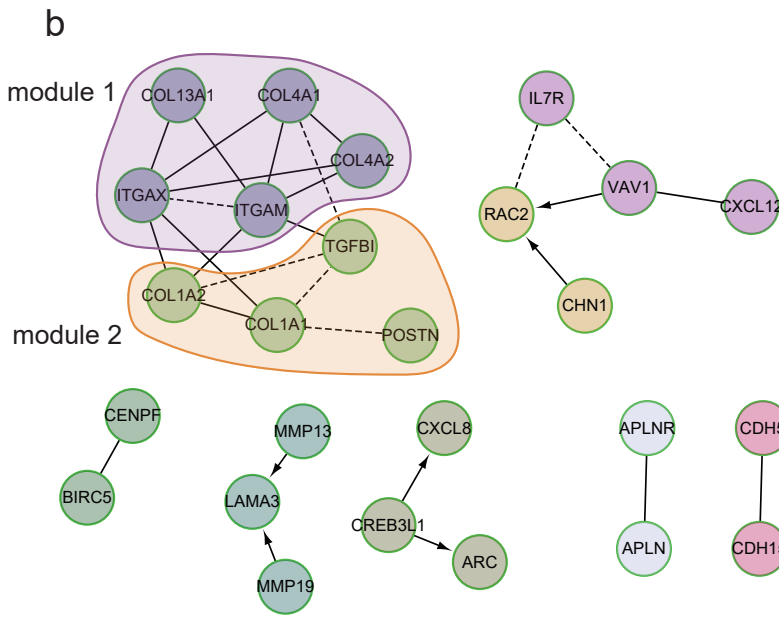

module1:  
 extracellular matrix organization(7.49E-10)  
 collagen catabolic process(1.40E-06)  
 collagen-activated tyrosine kinase  
 signaling pathway(3.46E-06)

module2:  
 extracellular matrix organization(5.02E-08)  
 skeletal system development(4.17E-06)  
 collagen fibril organization(5.78E-05)

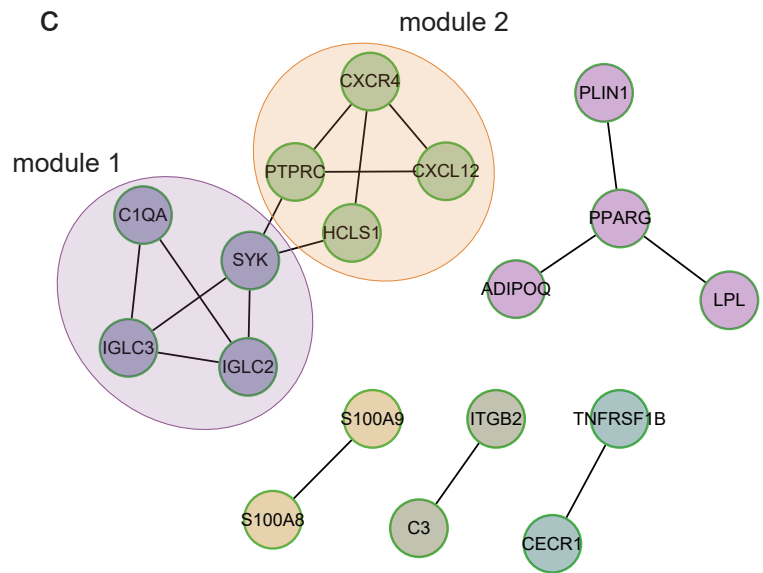

module1:  
 B cell receptor signaling pathway(2.78E-07)  
 innate immune response(7.48E-07)  
 defense response to bacterium(1.55E-06)

module2:  
 negative regulation of leukocyte apoptotic  
 process(1.52E-06)  
 cellular response to cytokine stimulus  
 (2.05E-05)
