# Supplementary material for: Classification of four distinct osteoarthritis subtypes with a knee joint tissue transcriptome atlas
Source: Springer Nature journal article supplement (doi:10.1038/s41413-020-00109-x), 2020-11-12

subgroup1(C1)  
81 patients

subgroup2(C2)  
23 patients

subgroup3(C3)  
10 patients

subgroup4(C4)  
17 patients

Age bin

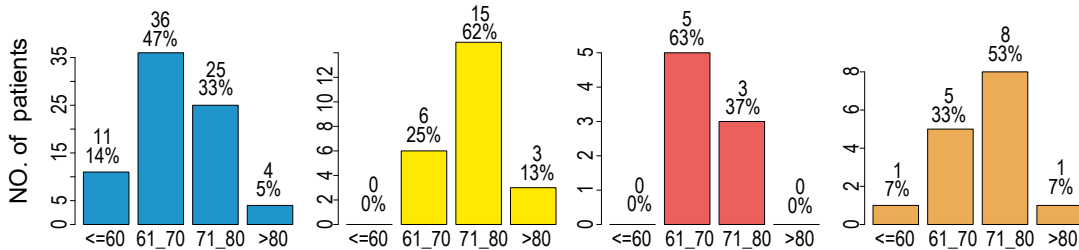

KL score

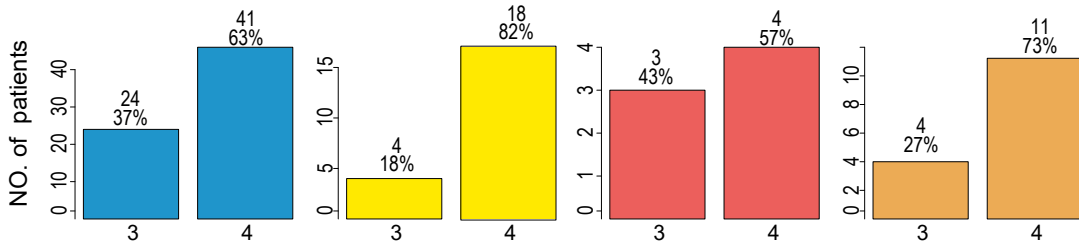

osteophyte score

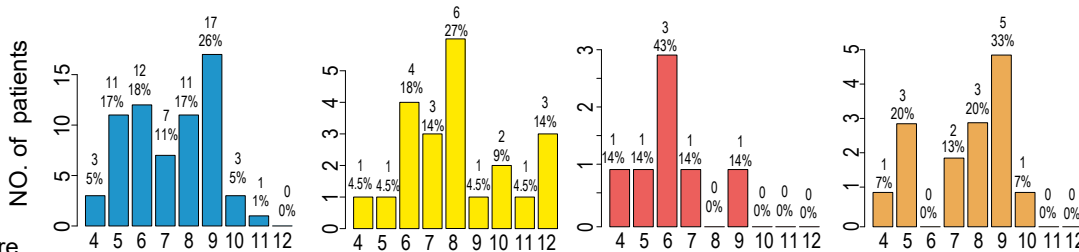

JSN score

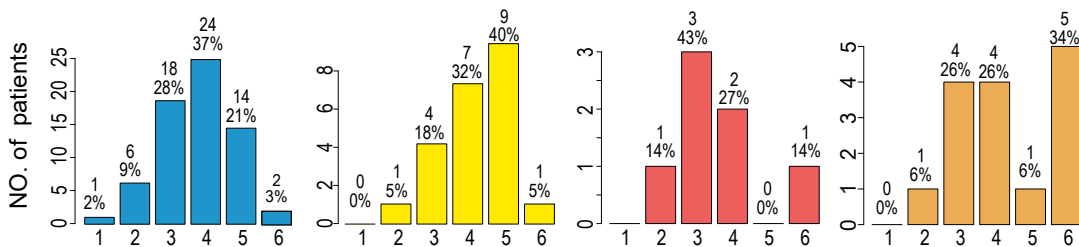

Supplement: 41413_2020_109_MOESM9_ESM.pdf [file 41413_2020_109_MOESM9_ESM.pdf]
