# Supplementary material for: Classification of four distinct osteoarthritis subtypes with a knee joint tissue transcriptome atlas
Source: Springer Nature journal article supplement (doi:10.1038/s41413-020-00109-x), 2020-11-12

## ROC curve

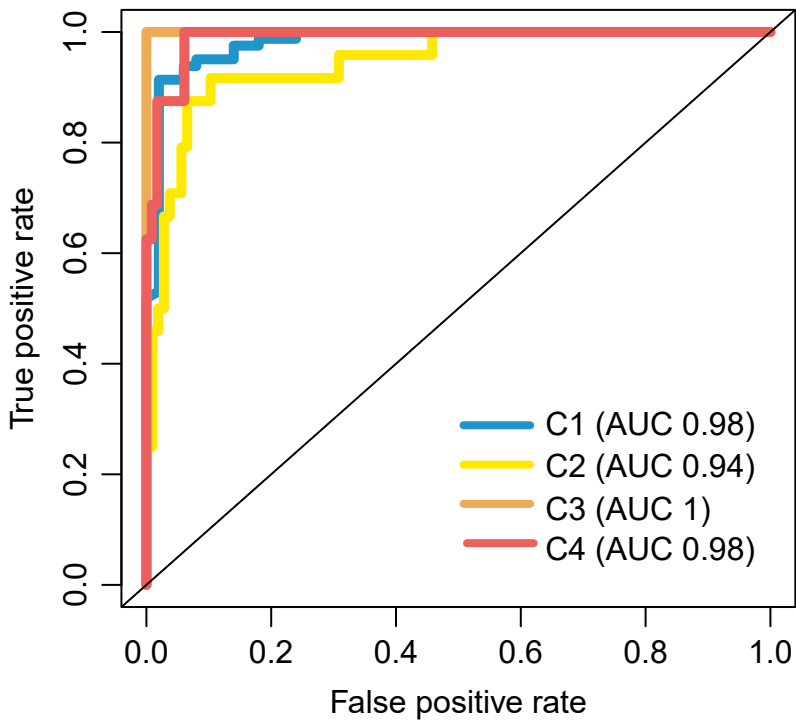

Supplement: 41413_2020_109_MOESM11_ESM.pdf [file 41413_2020_109_MOESM11_ESM.pdf]
